# Supplementary material
Source: publisher figshare collection journal article supplement (https://acs.figshare.com/ndownloader/files/5058562)
Supplement: Supplementary file 1 [file 5058562]

## Supplementary Material

Ms No: ja060776l

Title: Rapid-Freeze Quench ENDOR Study .....

Figure S1

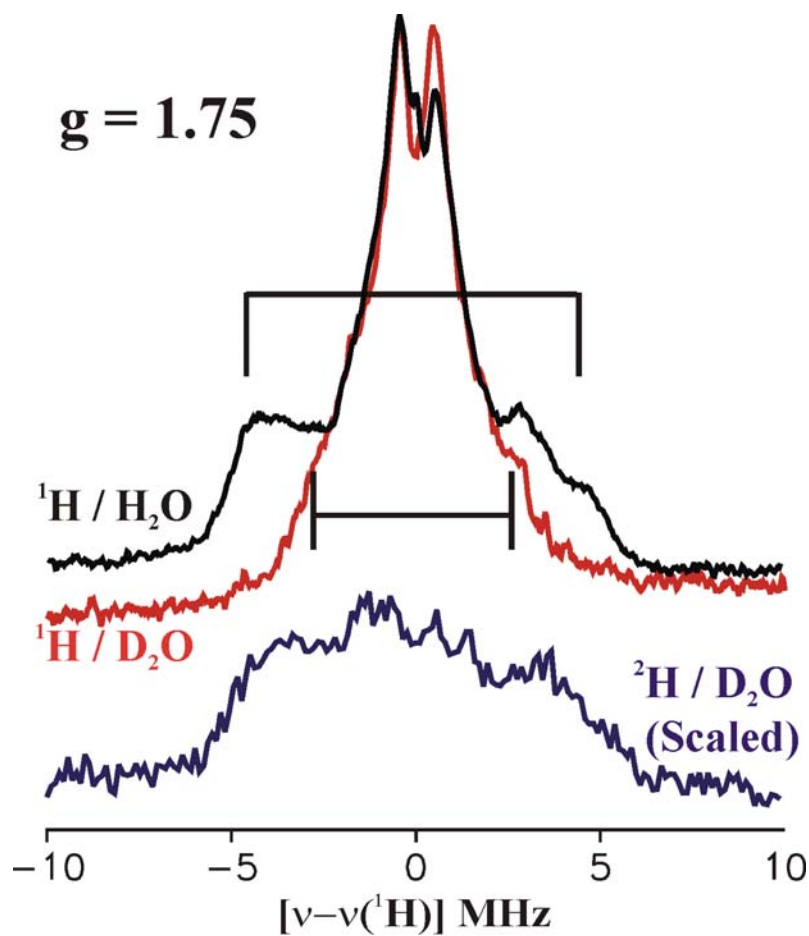

**Figure Legend:** (Top) CW  $^1\text{H}$  ENDOR of CPO-I in  $\text{H}_2\text{O}$  (Black line) and  $\text{D}_2\text{O}$  (Red line). Conditions: m.w. frequency = 35.47 GHz; modulation amplitude = 1 G; sweep rate = 1 MHz/s; 60 kHz broadening of r.f. excitation. (Bottom) Mims  $^2\text{H}$  ENDOR of CPO-I in  $\text{D}_2\text{O}$ . Conditions: m.w. frequency = 35.144 GHz;  $\tau = 500$  ns; 20  $\mu\text{S}$  rf; repetition rate, 50 Hz;  $t(\pi/2) = 52$  ns,  $T = 2\text{K}$ .
